# Supplementary material for: High-strength and fibrous capsule–resistant zwitterionic elastomers
Source: PubMed Central journal article supplement — Sci Adv. 2021 Jan 1;7(1):eabc5442. doi: 10.1126/sciadv.abc5442 (PMC7775767; doi:10.1126/sciadv.abc5442), 2021-01-01
Supplement: abc5442_SM.pdf [file abc5442_SM.pdf]

## Supplementary Materials for

### **High-strength and fibrous capsule-resistant zwitterionic elastomers**

Dianyu Dong, Caroline Tsao, Hsiang-Chieh Hung, Fanglian Yao, Chenjue Tang, Liqian Niu, Jinrong Ma, Joel MacArthur, Andrew Sinclair, Kan Wu, Priyesh Jain, Mitchell Ryan Hansen, Dorothy Ly, Sebastian Gia-huy Tang, Tammy My Luu, Parul Jain, Shaoyi Jiang\*

\*Corresponding author. Email: [sjiang@uw.edu](mailto:sjiang@uw.edu), [sj19@cornell.edu](mailto:sj19@cornell.edu)

Published 1 January 2021, *Sci. Adv.* **7**, eabc5442 (2021)

DOI: [10.1126/sciadv.abc5442](https://doi.org/10.1126/sciadv.abc5442)

#### **The PDF file includes:**

Figs. S1 to S7

Legends for movies S1 and S2

#### **Other Supplementary Material for this manuscript includes the following:**

(available at [advances.sciencemag.org/cgi/content/full/7/1/eabc5442/DC1](https://advances.sciencemag.org/cgi/content/full/7/1/eabc5442/DC1))

Movies S1 and S2

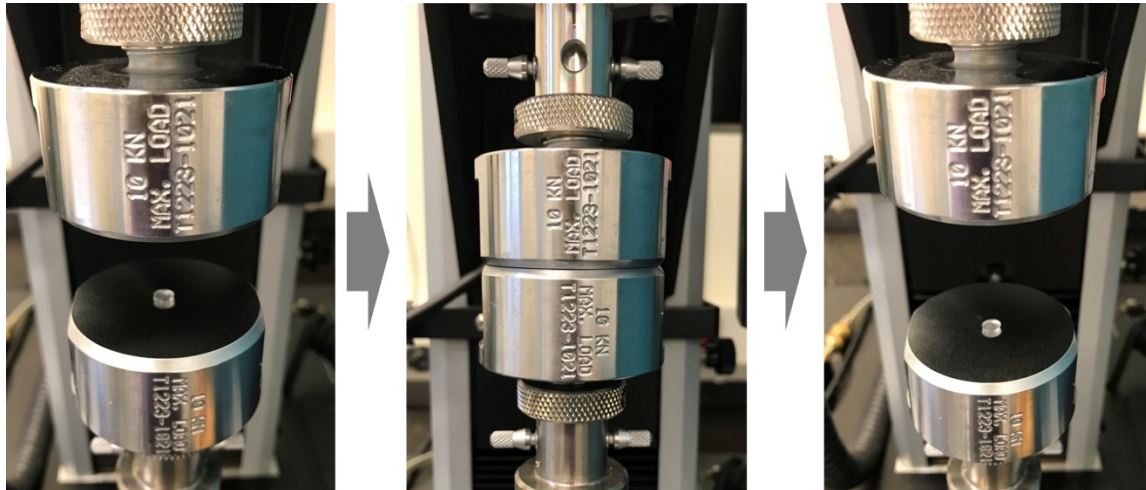

**Fig. S1. Representative images of the pCB/pSB ZEN hydrogel disk under a universal uniaxial compressive test.** The sample disk kept its original shape and appearance after being released from a compressive test to the testing limit of the tester when two anvils almost touched. Photo credit: D. Dong (University of Washington, Tianjin University).

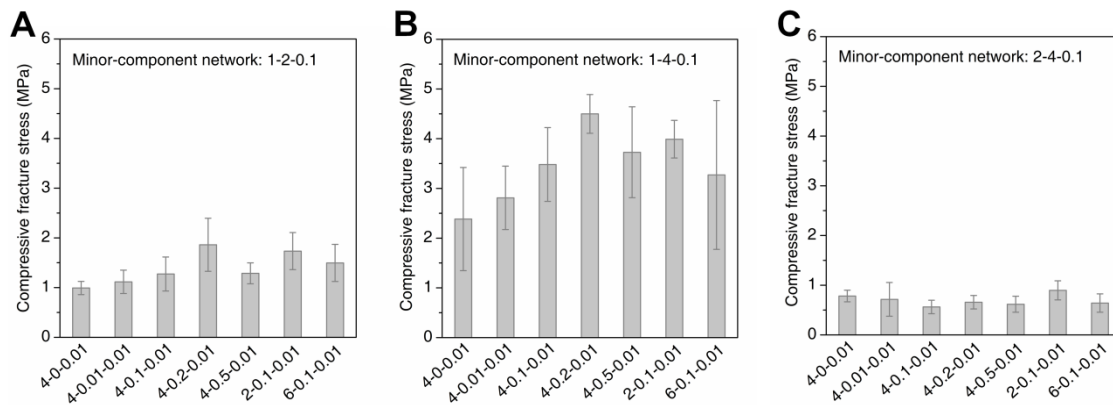

**Fig. S2. Compressive fracture stress of a series of pCB/pCB [minor-component/major-component network] hydrogels.** The minor-component networks were made according to the composition of (A) 1-2-0.1, (B) 1-4-0.1, and (C) 2-4-0.1, respectively. The major-component networks were made according to seven different compositions as indicated in the x-axis. Note that  $x$ ,  $y$  and  $z$  for  $x$ - $y$ - $z$  represent the molar monomer concentration, crosslinker (mol% respect to monomer), and initiator concentration (mol% respect to monomer), respectively.

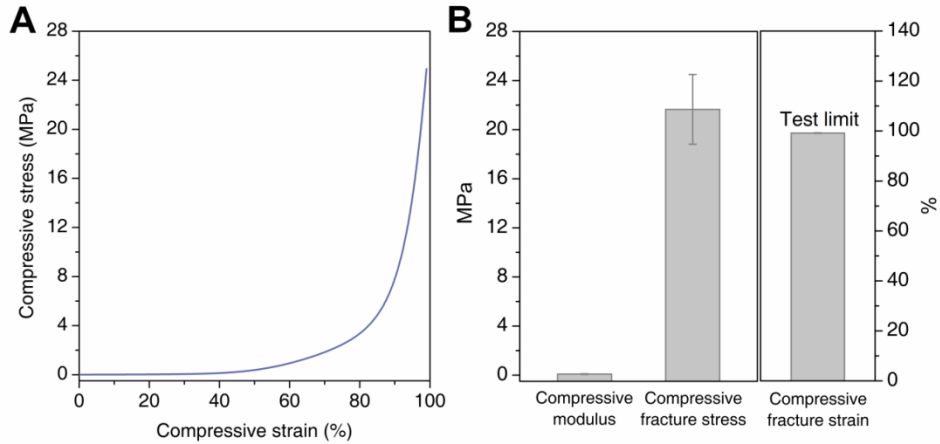

**Fig. S3. The compressive behavior of the pTMAO/pSB ZEN hydrogel.** The pTMAO/pSB ZEN hydrogel was made according to the composition of 1-4-0.1/4-0.1-0.01. Note that  $x$ ,  $y$ , and  $z$  for  $x_1$ - $y_1$ - $z_1$ / $x_2$ - $y_2$ - $z_2$  represent the molar monomer concentration, crosslinker (mol% respect to monomer), and initiator concentration (mol% respect to monomer) for the two component networks, respectively. (A and B) Representative compressive curve (A), Compressive modulus, fracture stress and fracture strain (B) of pTMAO/pSB hydrogel.

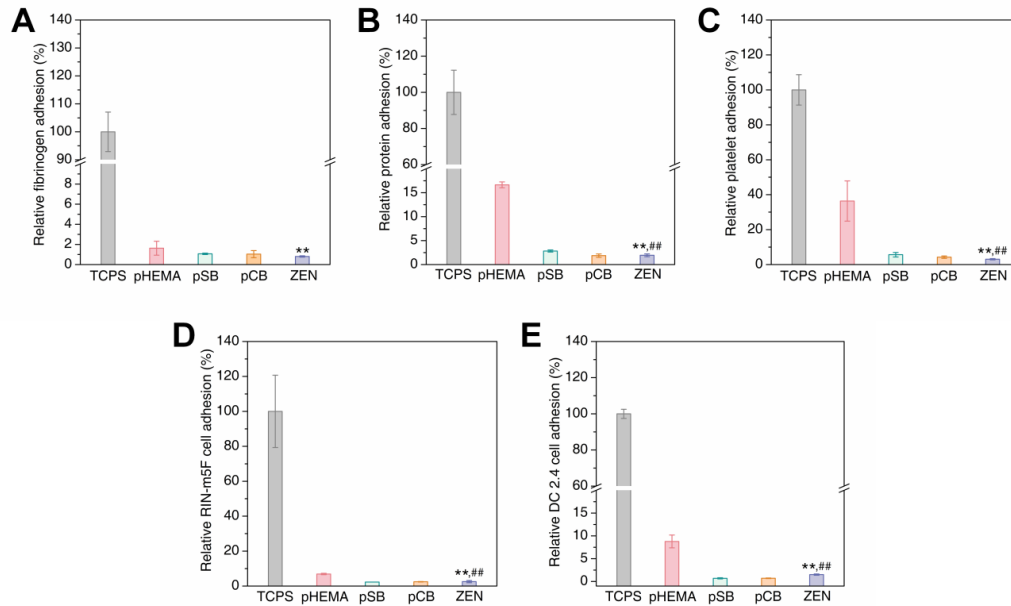

**Fig. S4. Biofouling tests of different material surfaces.** Relative (A) human fibrinogen protein, (B) undiluted human serum proteins adsorption, (C) rat platelets, (D) RIN-m5F cells, and (E) DC 2.4 cells adhesion onto the tissue culture polystyrene (TCPS) and different hydrogel surfaces. All the data were normalized with respect to TCPS. \*\* $P < 0.01$  vs. TCPS, ## $P < 0.01$  vs. pHEMA.

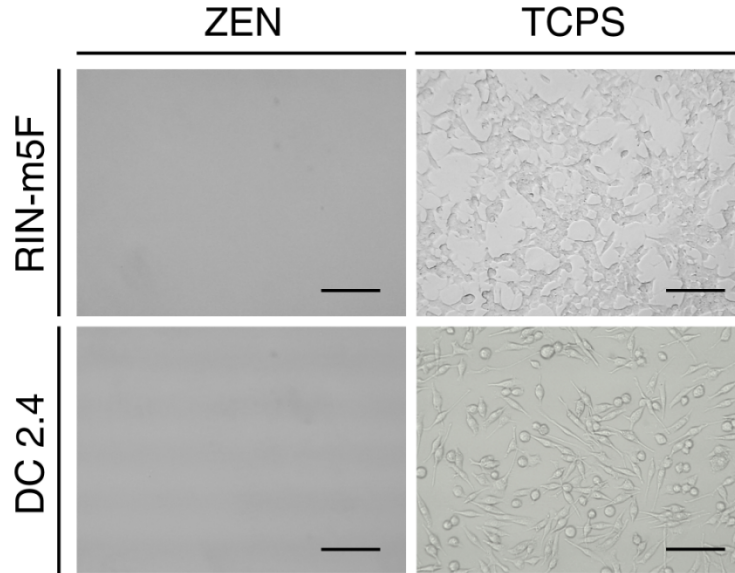

**Fig. S5. Cells adhesion on different material surfaces.** Optical images of RIN-m5F cells and DC 2.4 cells adhered onto tissue culture polystyrene (TCPS) and the pCB/pSB ZEN hydrogel surfaces. Scale bars represent 50  $\mu\text{m}$ .

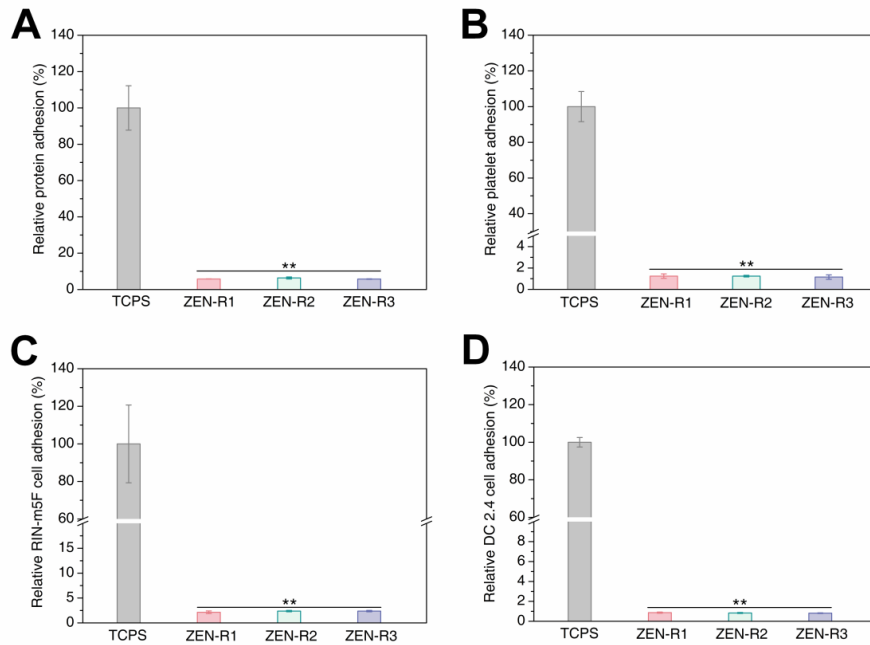

**Fig. S6. Biofouling tests of ZEN hydrogel surfaces after autoclaving sterilization.** Relative (A) undiluted human serum proteins, (B) rat platelets, (C) RIN-m5F cells, and (D) DC 2.4 cells adhesion onto the tissue culture polystyrene (TCPS) and the pCB/pSB ZEN hydrogel surfaces after one to three rounds of autoclaving sterilization. Each round of autoclaving sterilization is indicated as ZEN-R1, ZEN-R2, and ZEN-R3, respectively. All the data were normalized with respect to TCPS.  $**P < 0.01$  vs. TCPS.

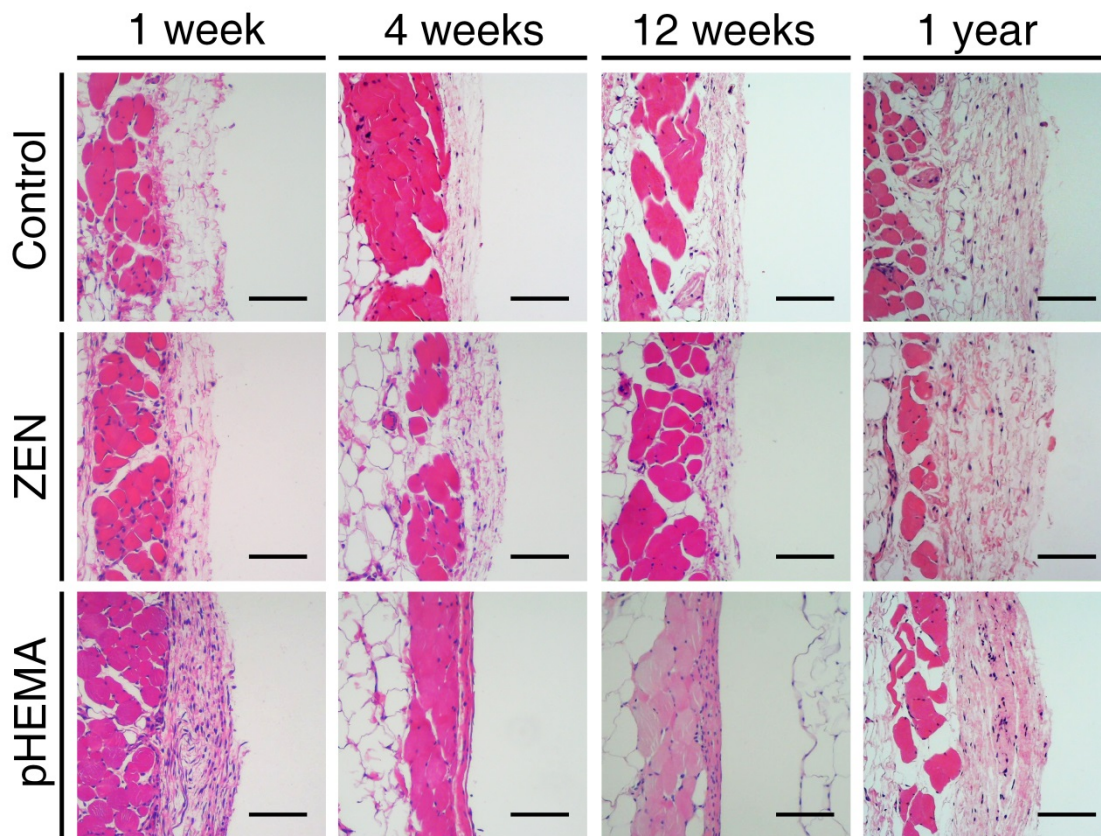

**Fig. S7. H&E staining for mouse skin tissues with different hydrogel samples after subcutaneous implantation in mice for 1, 4, 12 weeks, and 1 year.** Positive controls were skin tissues collected from mice that were implanted with pHEMA hydrogels, while negative controls were collected from mice that did not undergo any surgeries or other experiments.  $n = 3$  for all the implantation experiments (three mice per experiment group/condition, two hydrogel samples per mouse for ZEN or pHEMA hydrogels implantation). Scale bars represent 100  $\mu\text{m}$ . The basophilic discoloration and increased cell counts (stained dark purple) at the tissue in contact with pHEMA hydrogels indicates the accumulation of cells into the interface.

**Movie S1. ZEN hydrogel sheet can be stretched and folded.** The pCB/pSB ZEN hydrogel sheet can be stretched and folded repeatedly without any visible damage observed. Movie credit: D. Dong (University of Washington, Tianjin University).

**Movie S2. ZEN rope-shaped hydrogel can tie knots.** The pCB/pSB ZEN rope-shaped hydrogel with a cross-section diameter of 6 mm can tie multiple knots and be stretched without breaking. Movie credit: D. Dong (University of Washington, Tianjin University).
